# Supplementary material for: Umbilical cord mesenchymal stem cells enhance the therapeutic effect of imipenem by regulating myeloid-derived suppressor cells in septic mice
Source: PubMed Central journal article supplement — Ann Transl Med. 2021 Mar;9(5):404. doi: 10.21037/atm-20-6371 (PMC8033360; doi:10.21037/atm-20-6371), 2021-03
Supplement: atm-09-05-404-supplementary.pdf [file atm-09-05-404-supplementary.pdf]

**Table S1** Primers for real-time PCR

| Genes                         | Forward (5'-3')           | Reverse (5'-3')          |
|-------------------------------|---------------------------|--------------------------|
| <i>GAPDH</i>                  | TTGATGGCAACAATCTCCAC      | CGTCCCGTAGACAAAATGGT     |
| <i>Arg-1</i>                  | CTCCAAGCCAAAGTCCTTAGAG    | AGGAGCTGTCATTAGGGACATC   |
| <i>iNOS</i>                   | CTGCAGCACTTGGATCAGGAACCTG | GGAGTAGCCTGTGTGCACCTGGAA |
| <i>gp91</i>                   | CCAGTGAAGATGTGTTTCAGCT    | GCACAGCCAGTAGAAGTAGAT    |
| <i>p47</i>                    | ACACCTTCATTGCCATATTGC     | TCGGTGAATTTTCTGTAGACCAC  |
| <i>TGF-<math>\beta</math></i> | GAGCCCGAAGCGGACTACTA      | CACTGCTCCCGAATGTCTGA     |

iNOS, inducible nitric oxide synthase; TGF- $\beta$ , transforming growth factor- $\beta$ ; gp91, gp91-phox; p47, p47-phox; Arg-1, arginase-1.
